# Supplementary material for: Increased PRL-1 in BM-derived MSCs triggers anaerobic metabolism via mitochondria in a cholestatic rat model
Source: PubMed Central journal article supplement (PMC9970868; doi:10.1016/j.omtn.2023.01.017), 2023-02-04
Supplement: mmc1.pdf [file mmc1.pdf]

**OMTN, Volume 31**

**Supplemental information**

**Increased PRL-1 in BM-derived MSCs  
triggers anaerobic metabolism via  
mitochondria in a cholestatic rat model**

**Jae Yeon Kim, Se Ho Kim, Jin Seok, Si Hyun Bae, Seong-Gyu Hwang, and Gi Jin Kim**

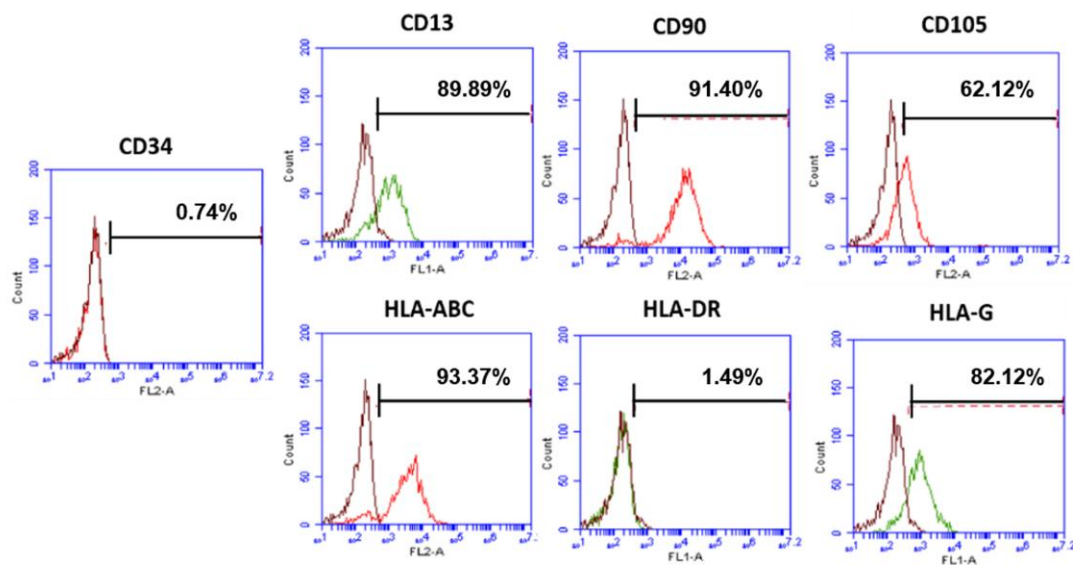

**Figure S1.** FACS analysis of surface markers related to hematopoietic cells and nonhematopoietic cells, and HLA family members in BM-MSCs<sup>PRL-1</sup> using nonviral AMAXA gene delivery system.

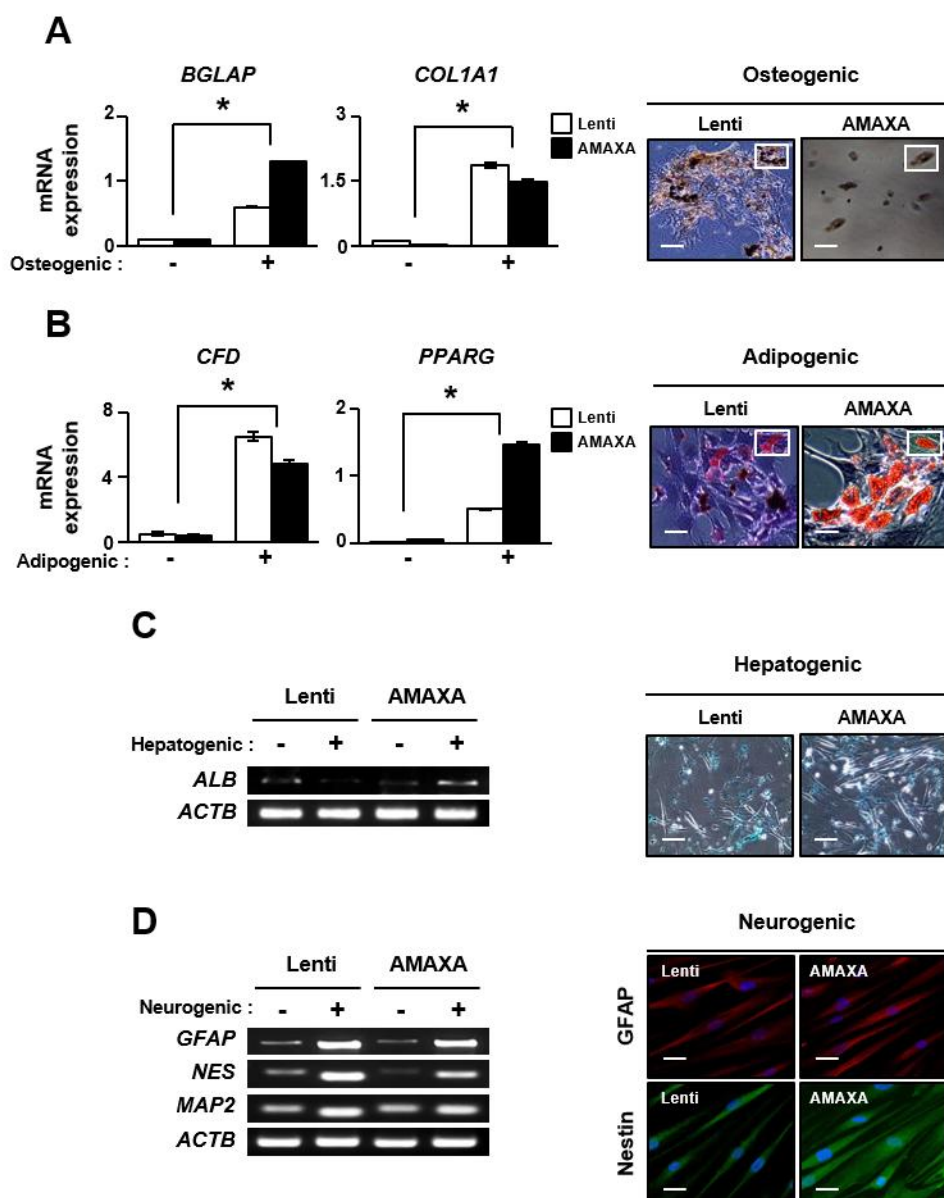

**Figure S2. Potential for multi-differentiation of BM-MSCs<sup>PRL-1</sup>.**

(A) qRT-PCR analysis of osteogenic markers (*BGLAP* and *COL1A1*) in undifferentiated (-) and differentiated (+) BM-MSCs<sup>PRL-1</sup>. Von Kossa staining for osteogenic differentiation of BM-MSCs<sup>PRL-1</sup>. Scale bars = 50  $\mu$ m. (B) qRT-PCR analysis of adipogenic markers (*CFD* and *PPARG*) in undifferentiated and differentiated BM-MSCs<sup>PRL-1</sup>. Oil Red O staining for adipogenic differentiation of BM-MSCs<sup>PRL-1</sup>. Scale bars = 50  $\mu$ m. (C) RT-PCR analysis of albumin (*ALB*) expression in undifferentiated and differentiated BM-MSCs<sup>PRL-1</sup>. ICG uptake

in BM-MSCs<sup>PRL-1</sup> after hepatogenic differentiation. Scale bars = 50  $\mu$ m.

**(D)** RT-PCR analysis of neurogenic markers (*GFAP*, *NES*, and *MAP2*) in undifferentiated and differentiated BM-MSCs<sup>PRL-1</sup>. Immunofluorescence of GFAP (red) and Nestin (green) expression as well as DAPI (blue) BM-MSCs<sup>PRL-1</sup>. Values represent the mean  $\pm$  SD. \*  $p < 0.05$  in comparison with undifferentiated groups.

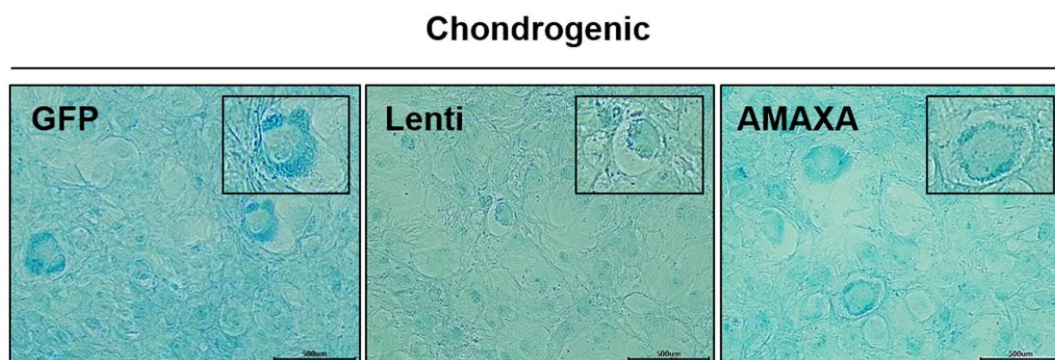

**Figure S3. Potential for chondrogenic differentiation of BM-MSCs<sup>PRL-1</sup>.** Alcian staining for chondrogenic differentiation of BM-MSCs<sup>PRL-1</sup>. Scale bars = 500 µm.

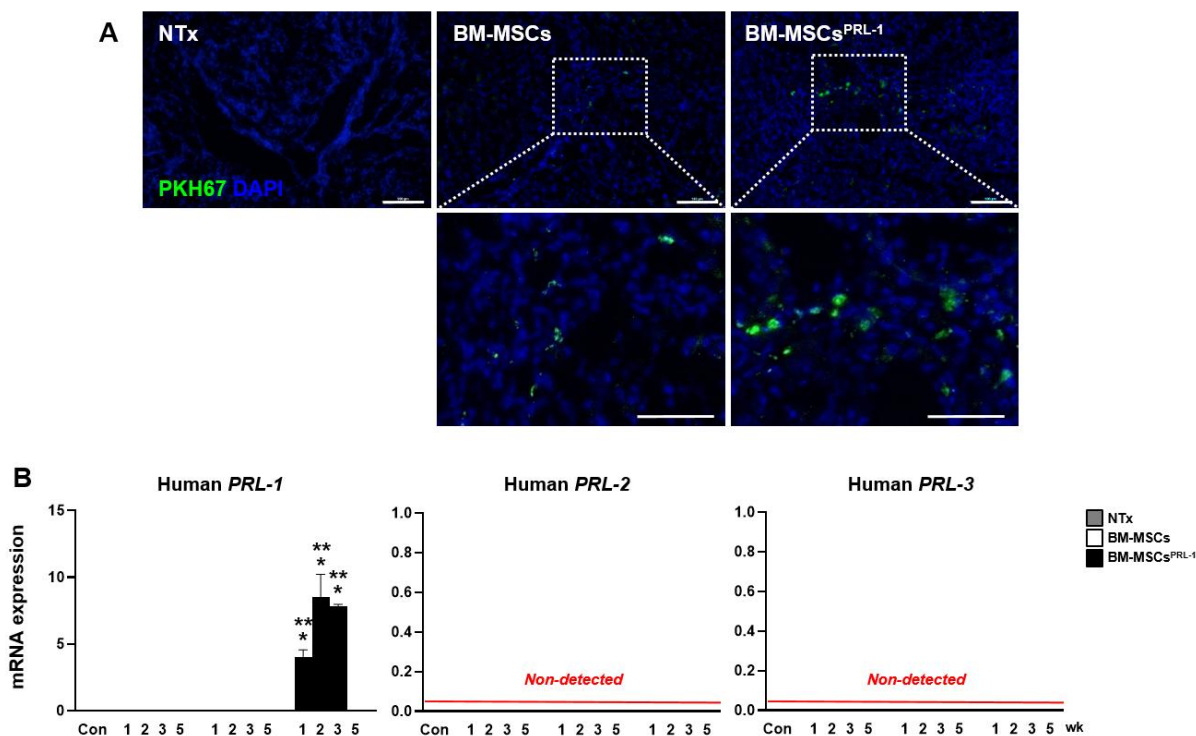

**Figure S4. MSC Engraftment in BDL-injured rat liver tissues.**

(A) PKH67 signals in BDL-injured rat liver tissues by fluorescence (PKH67 = green; DAPI = blue). Scale bars = 100  $\mu$ m.

(B) qRT-PCR analysis of human PRLs in pooled liver samples ( $n = 5\sim 6$ /group). Values represent the mean  $\pm$  SD. \*  $p < 0.05$  in comparison with the NTx group. \*\*  $p < 0.05$  in comparison with BM-MSCs.

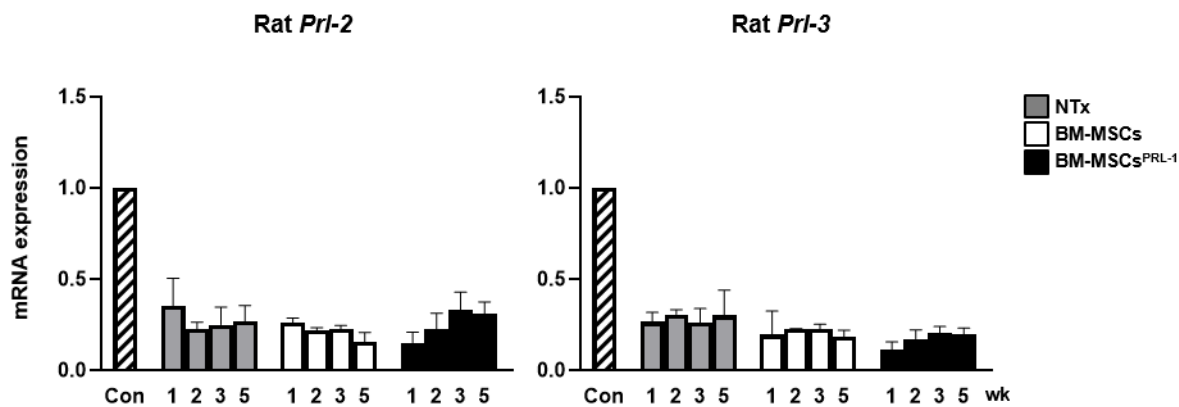

**Figure S5.** mRNA expression of rat PRL-2 and 3 in a BDL-injured rat liver. Values represent the mean  $\pm$  SD.

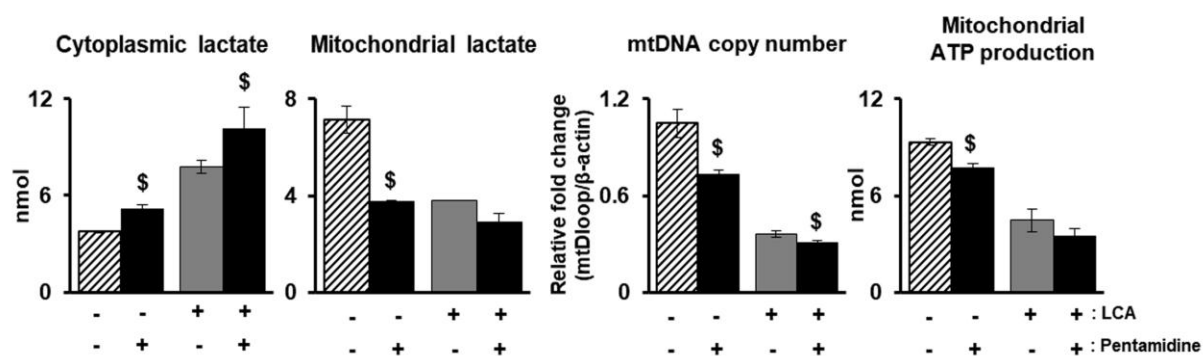

**Figure S6.** *Cytoplasmic and mitochondrial lactate, mtDNA copy number, and mitochondrial ATP production assay in LCA-injured hepatocyte according to pentamidine (1  $\mu\text{g/ml}$ ) treatment.* Values represent the mean  $\pm$ SD.  $^{\$}p < 0.05$  in comparison with non-pentamidine treatment.



**Table S1: qRT-PCR primer sequences**

| Genes          |         | Primer sequences                | Tm |
|----------------|---------|---------------------------------|----|
| <i>POU5F1</i>  | Forward | 5'-AGTGAGAGGCAACCTGGAGA-3'      | 52 |
|                | Reverse | 5'-GTGAAGTGAGGGCTCCCATA-3'      |    |
| <i>NANOG</i>   | Forward | 5'-TTCTTGACTGGGACCTTGTC-3'      | 52 |
|                | Reverse | 5'-GCTTGCCTTGCTTTGAAGCA-3'      |    |
| <i>SOX2</i>    | Forward | 5'-GGGCAGCGTGTACTTATCCT-3'      | 52 |
|                | Reverse | 5'-AGAACCCCAAGATGCACAAC-3'      |    |
| <i>HLA-G</i>   | Forward | 5'-GCGGCTACTACAACCAGAGC-3'      | 58 |
|                | Reverse | 5'-GCACATGGCACGTGTATCTC-3'      |    |
| <i>TERT</i>    | Forward | 5'-GAGCTGACGTGGAAGATGAG-3'      | 55 |
|                | Reverse | 5'-CTTCAAGTGCTGTCTGATTCCAATG-3' |    |
| <i>Albumin</i> | Forward | 5'-TGAGTTTGCAGAAGTTTCCA-3'      | 60 |
|                | Reverse | 5'-CCTTTGCCTCAGCATAGTTT-3'      |    |
| <i>BGLAP</i>   | Forward | 5'-CACTCCTCGCCCTATTGGC-3'       | 58 |
|                | Reverse | 5'-CCCTCCTGCTTGGACACAAAG-3'     |    |
| <i>COL1A1</i>  | Forward | 5'-AGACATCCCACCAATCACCT-3'      | 60 |
|                | Reverse | 5'-CGTCATCGCACAACACCT-3'        |    |
| <i>CFP</i>     | Forward | 5'-GGTCACCCAAGCAACAAAGT-3'      | 60 |
|                | Reverse | 5'-CCTCCTGCGTTCAAGTCATC-3'      |    |
| <i>PPARG</i>   | Forward | 5'-TTGACCCAGAAAGCGATTCC-3'      | 60 |
|                | Reverse | 5'-AAAGTTGGTGGGCCAGAATG-3'      |    |
| <i>GFAP</i>    | Forward | 5'- ATCAACTCACCGCCAACA -3'      | 60 |
|                | Reverse | 5'- CGACTCAATCTTCCCTCTCCAG -3'  |    |
| <i>NES</i>     | Forward | 5'- GGTGGAGAAGGACCAAGAAGT -3'   | 58 |
|                | Reverse | 5'- AGACCTCCTCTGTGGCATTCA -3'   |    |
| <i>MAP2</i>    | Forward | 5'- CAGGAATTGACTCCCTCTACAGC -3' | 60 |

|                |         |                                        |    |
|----------------|---------|----------------------------------------|----|
|                | Reverse | 5'- TCTTCACCAGGCTTACTTTGC -3'          |    |
|                | Forward | 5'- TGGTGATGGCCTCCCTGTACCACATCT -3'    |    |
| <i>HMOX1</i>   | Reverse | 5'- AGAGCTGGATGTTGAGCAGGAACGCAGTCT -3' | 60 |
|                | Forward | 5'- ATGTCAGCGGAAGTGGAA -3'             |    |
| <i>HMOX2</i>   | Reverse | 5'- GGGAGTTTCAGTGCTCGC -3'             | 60 |
|                | Forward | 5'- GCTGTACCAGTGCAGGTCCTCA -3'         |    |
| <i>SOD1</i>    | Reverse | 5'- CATTTCACCTTTGCCCAAGTC -3'          | 60 |
|                | Forward | 5'- GGAGAACCCAAAGGGGAGTTG -3'          |    |
| <i>SOD2</i>    | Reverse | 5'- GCCGTCAGCTTCTCCTTAAAC -3'          | 60 |
|                | Forward | 5'- ACACCCAGATGAACGAGCTG -3'           |    |
| <i>GPX1</i>    | Reverse | 5'- CAAACTGGTTGCACGGGAAG -3'           | 60 |
|                | Forward | 5'-GCTTCAGAATTGCCAACCAC-3'             |    |
| <i>NRF1</i>    | Reverse | 5'-GTCATCTCACCTCCCTGTAAC-3'            | 60 |
|                | Forward | 5'-CAGCAAAAGCCACAAAGACG-3'             |    |
| <i>PGC1A</i>   | Reverse | 5'-GGGTCAGAGGAAGAGATAAAGTTG-3'         | 60 |
|                | Forward | 5'-GAACAAC TACCCATATTTAAAGCTCA-3'      |    |
| <i>TFAM</i>    | Reverse | 5'-GAATCAGGAAGTTCCCTCCA-3'             | 60 |
|                | Forward | 5'-TCCTTCTGCATCCTGTCAGCA-3'            |    |
| <i>β-actin</i> | Reverse | 5'-CAGGAGATGGCCACTGCCGCA-3'            | 58 |
